# Supplementary material for: Electrodeposited rGO/AuNP/MnO2 Nanocomposite-Modified Screen-Printed Carbon Electrode for Sensitive Electrochemical Sensing of Arsenic(III) in Water
Source: MDPI journal article supplement (doi:10.3390/bios13050563), 2023-05-21
Supplement: s1 [file s1]

Supplementary Material

# Electrodeposited rGO/AuNP/MnO<sub>2</sub> Nanocomposite-modified Screen-Printed Carbon Electrode for Sensitive Electrochemical Sensing of Arsenic(III) in Water

Yanqing Wu, Tao Zhang, Lishen Su and Xiaoping Wu \*

Key Laboratory for Analytical Science of Food Safety and Biology (Ministry of Education & Fujian Province), College of Chemistry, Fuzhou University, Fuzhou 350116, China; lalalawuuu@163.com (Y.W.); taozhang202304@163.com (T.Z.); 201310017@fzu.edu.cn (L.S.)

\* Correspondence: wapple@fzu.edu.cn

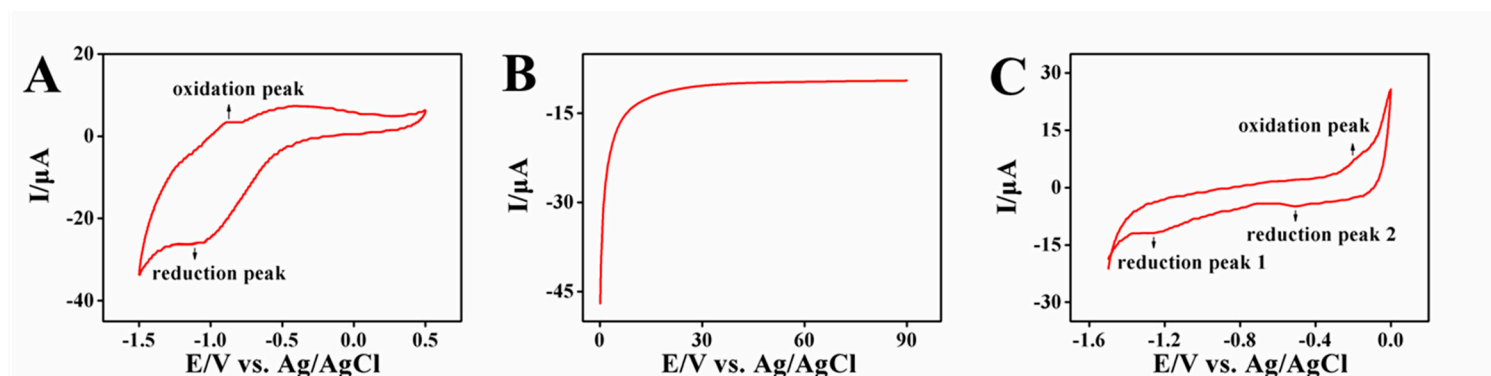

**Figure S1.** Cyclic voltammograms for (A) synthesis of rGO/SPCE in 1.0 mg mL<sup>-1</sup> graphene oxide dispersion (0.1 mol L<sup>-1</sup> pH 9.0 CBS). Segments: 8. Scan rate: 50 mV/s; (B) synthesis of rGO/AuNPs/SPCE via constant potential deposition in 1.0 mmol L<sup>-1</sup> HAuCl<sub>4</sub> (0.2 mol L<sup>-1</sup> Na<sub>2</sub>SO<sub>4</sub>). Deposition potential: -0.2 V. Deposition time: 90 s; (C) synthesis of rGO/AuNPs/MnO<sub>2</sub>/SPCE in 0.05 mol L<sup>-1</sup> C<sub>4</sub>H<sub>6</sub>MnO<sub>4</sub>•4H<sub>2</sub>O (0.1 mol L<sup>-1</sup> Na<sub>2</sub>SO<sub>4</sub>). Segments: 2. Scan rate: 50 mV/s.

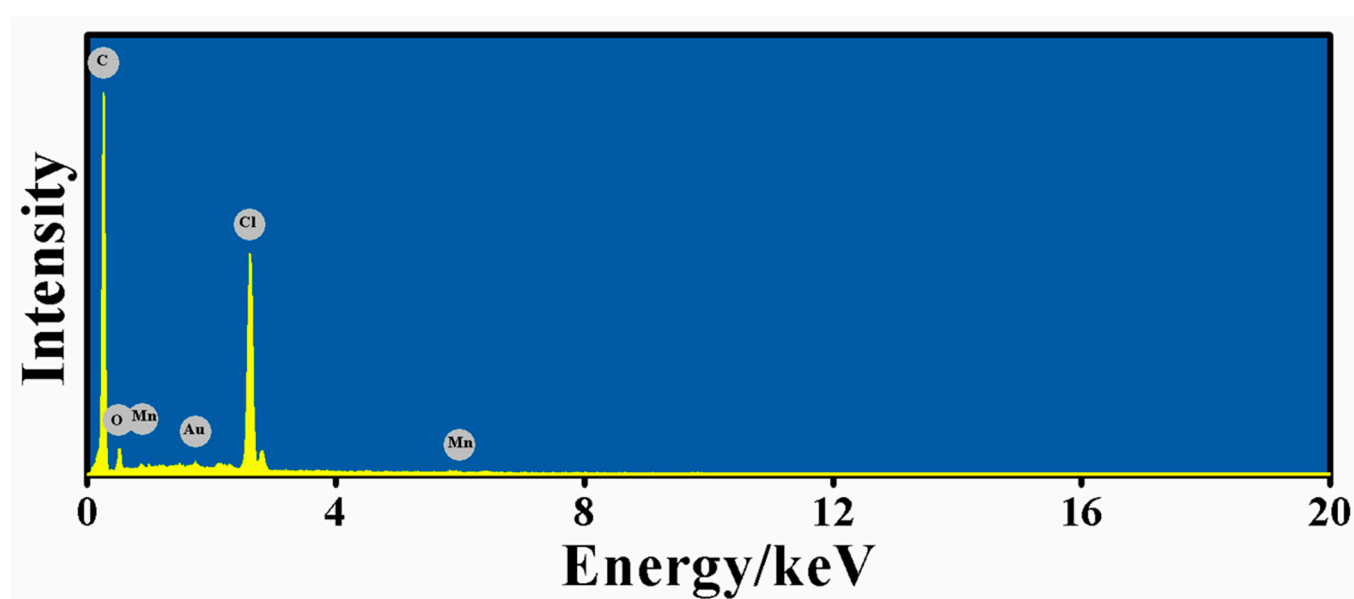

**Figure S2.** EDS images of rGO/AuNPs/MnO<sub>2</sub>/SPCE.

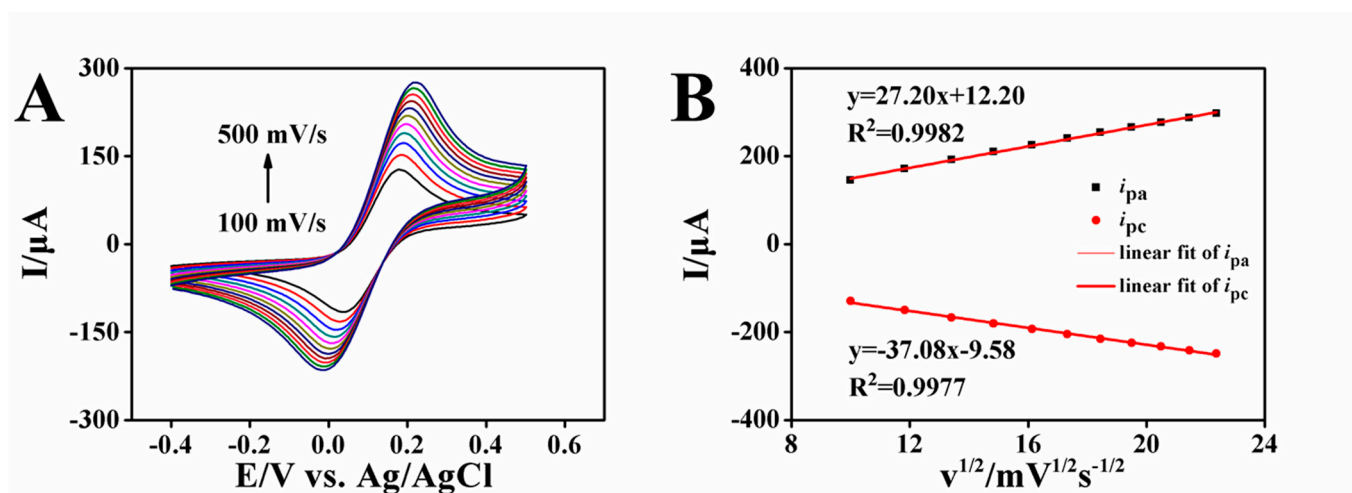

**Figure S3.** Cyclic voltammograms of 5 mmol/L  $\text{Fe}(\text{CN})_6^{3-/4-}$  in a 0.1 mol/L KCl solution recorded on rGO/AuNPs/MnO<sub>2</sub>/SPCE at different scan rates (A); Corresponding linear relationship between the redox peak currents and the scan rate (B).

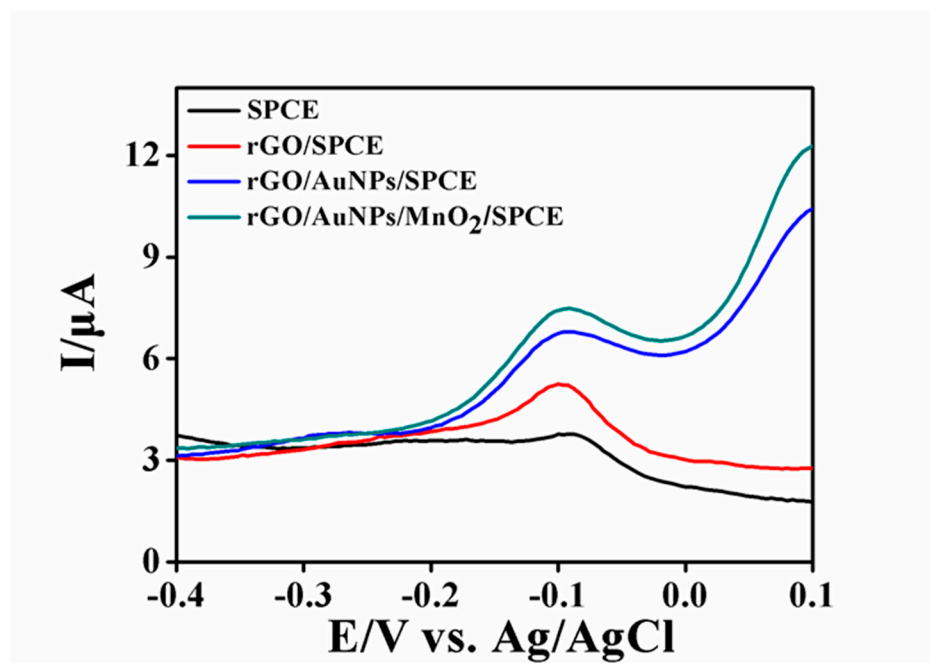

**Figure S4.** SWASV responses for 100 ppb As(III) in 0.01 mol L<sup>-1</sup> H<sub>2</sub>SO<sub>4</sub> solution on the bare SPCE, rGO/SPCE, rGO/AuNPs/SPCE and rGO/AuNPs/MnO<sub>2</sub>/SPCE. Deposition potential: −1.4 V; deposition time: 180 s.

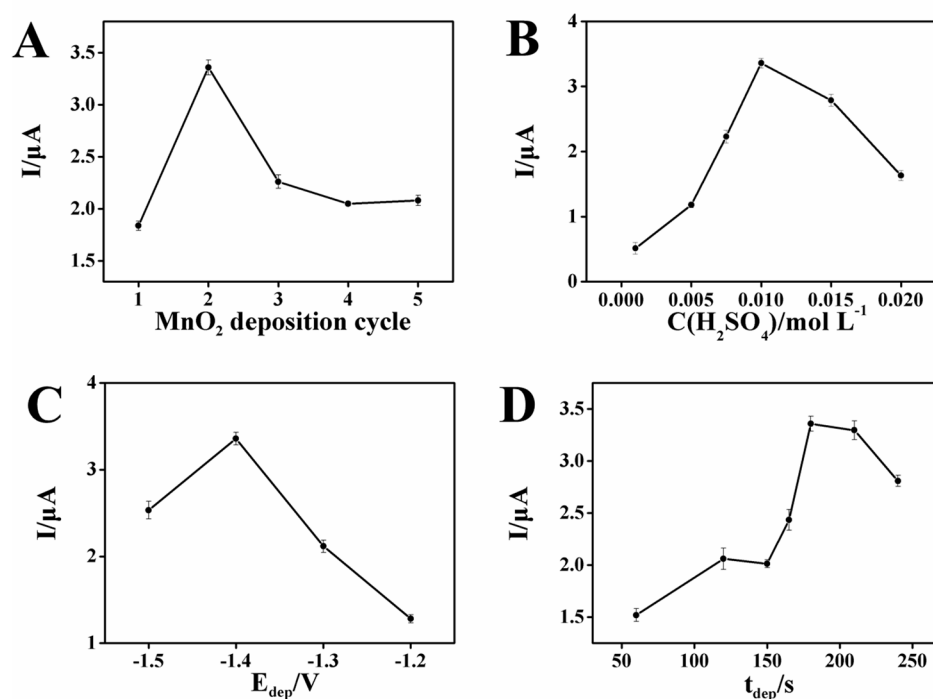

**Figure S5.** The influences of deposition cycles for  $\text{MnO}_2$ (A), pH(B), deposition potential(C) and deposition time(D) on the stripping peak current of 100 ppb As(III).

**Table S1.** The reproducibility of as-prepared SPCE-based sensor for the detection of As(III)( $n=3$ ).

| Sample number | Concentration of As(III) ( $\mu\text{g L}^{-1}$ ) | Run-to-run RSD (%) | Batch-to-batch RSD (%) |
|---------------|---------------------------------------------------|--------------------|------------------------|
| 1             | 50                                                | 3.5                | 4.9                    |
| 2             | 100                                               | 4.1                | 4.4                    |
| 3             | 150                                               | 5.0                | 4.3                    |
